# Supplementary material
Source: publisher site journal article supplement (https://www.kjim.org/upload/media/kjim-2020-195-suppl11.pdf)

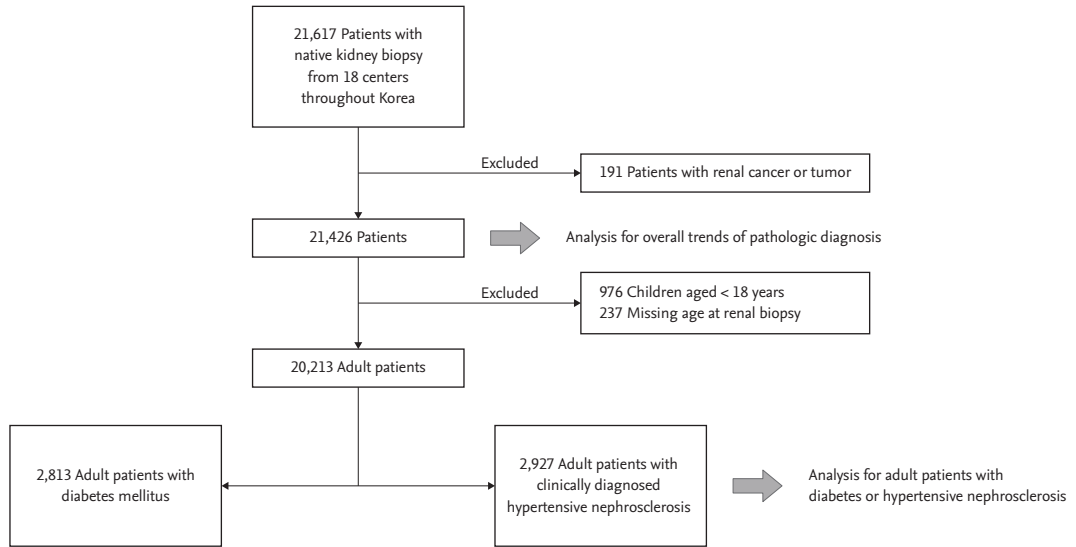

Supplementary Figure 1. Enrollment of patients.

Supplement: Supplementary file 1 [file kjim-2020-195-suppl11.pdf]
